# Supplementary material
Source: PubMed Central journal article supplement (PMC6456855)
Supplement: JB.00732-18-s0001.pdf [file JB.00732-18-s0001.pdf]

## Supplemental material

# Phosphosugar stress in *Bacillus subtilis*: Intracellular accumulation of mannose 6-phosphate derepressed the *glcR-phoC* operon from repression by GlcR

Kambiz Morabbi Heravi<sup>1#</sup>, Irfan Manzoor<sup>2,3</sup>, Hildegard Watzlawick<sup>1</sup>, Anne de Jong<sup>2</sup>, Oscar P. Kuipers<sup>2</sup>, Josef Altenbuchner<sup>1</sup>

<sup>1</sup> Institut für Industrielle Genetik, Universität Stuttgart, Allmandring 31, 70569 Stuttgart, Germany

<sup>2</sup> Department of Molecular Genetics, Groningen Biomolecular Sciences and Biotechnology Institute, University of Groningen, Groningen, the Netherlands

<sup>3</sup> Department of Bioinformatics and Biotechnology, Govt College University Faisalabad, Allama Iqbal Road Faisalabad, Pakistan

**Running title:** Phosphosugar stress in *B. subtilis*

**Key words:** mannose, PTS, carbohydrate, repressor, phosphatase, stress response system

**#Corresponding author:** Kambiz Morabbi Heravi<sup>1</sup>

E-Mail: [kambiz.morabbi@iig.uni-stuttgart.de](mailto:kambiz.morabbi@iig.uni-stuttgart.de)

Tel.: +49 711 685 66982

Fax: +49 711 685 66973

---

Current Address: Kambiz Morabbi Heravi  
University of Hohenheim, Inst. Food Science and Biotechnology, Dept. Bioprocess Engineering (150k),  
Fruwirthstr. 12, 70599 Stuttgart, Germany  
E-mail: [k.morabbi@uni-hohenheim.de](mailto:k.morabbi@uni-hohenheim.de)  
Tel: +49 711 459-24728  
Fax: +49 711 459-24722

## MATERIALS AND METHODS

### DNA manipulation and plasmid construction

All plasmids used in this study are listed in Table S2. To construct plasmids used, standard molecular techniques were performed as described by J. Sambrook and D. W. Russell (1). The desired DNA fragments were amplified in polymerase chain reactions (PCRs) using Phusion<sup>®</sup> HF DNA Polymerase (#M0530S) from New England BioLabs<sup>®</sup> (Frankfurt am Main, Germany). The PCRs were carried out on a LifeECO BTC42096 PCR thermal cycler (Hangzhou Bioer Technology Co. Ltd., China). Unless otherwise specified, the chromosomal DNA (cDNA) of *B. subtilis* KM0 was used as a template for PCR. The cDNA of each strain was extracted with DNeasy<sup>®</sup> Blood & Tissue Kit from Qiagen (Hilden, Germany) according to the manufactures' instruction. The specific oligonucleotides for PCR or electrophoretic gel shift assay (EMSA) were synthesized by Eurofins MWG Operons (Ebersberg, Germany) (Table S3). Digestion of DNA fragments was carried out with restriction enzymes purchased from New England BioLabs<sup>®</sup> (Frankfurt am Main, Germany). PCR products or DNA fragments cut from agarose gel were purified with NucleoSpin<sup>®</sup> Gel and PCR Clean-up (Macherey-Nagel GmbH, Düren, Germany). Ligation of the DNA fragments was catalyzed by T4 DNA ligase (Thermo Fisher Scientific, Karlsruhe, Germany). Plasmid DNAs were extracted with innuPREP Plasmid Mini Kit (Analytik Jena AG, Jena, Germany) and sequenced by GATC Biotech AG (Konstanz, Germany).

As the parental plasmid, pJOE4786.1 was used for cloning of the PCR fragments in *E. coli*. Plasmid pJOE4786.1 carries a multiple cloning site within *lacPOZ'* enabling the blue/white screening. The presence of two palindromic sequences upstream and downstream of the *lacPOZ'* forms a strong loop inhibiting the replication of plasmids lacking insert (2). For purification of the proteins, plasmids pJOE6089.4 (C-terminus *Strep* tag fusion) and pJOE6091.1 (N-terminus *Strep* tag fusion) were used both of which carry L-rhamnose-inducible *rhaP<sub>BAD</sub>* (3). The derivatives of integration plasmid pKAM19 were used for markerless gene deletion in *B. subtilis* based on the *mroxP-cat-mroxP* cassette (4). The genome integrated *mroxP* sites (a hybrid of the *loxP* and *mrxP* sites) were then resolved into the *mrmrP* sites using unstable plasmid pJOE6732.1 (5). pJOE6732.1 was a derivative of pAM $\beta$ 1 expressing *cre*, encoding the site-specific recombinase of bacteriophage P1, under control of P<sub>*xyIA*</sub> (6). The derivative of pMW521.1 was used for markerless

gene deletion based on the temperature-sensitive origin of replication of pE194 (7). Plasmids carrying *lacZ* as a reporter gene were constructed from pKAM263 in order to be integrated into *amyE* loci (8).

### **Construction of *E. coli* and *B. subtilis* mutants**

Transformation of *E. coli* strains were carried out according to the standard heat-shock method (1). To remove the kanamycin resistance gene (*kanR*) from the genome of JW2409-1, plasmid pCP20 expressing *flp* (encodes resolvase) was used to construct KM0446 (9). Briefly, after transformation of JW2409-1 with pCP20, the transformants were selected on LB with ampicillin at 30 °C. A single transformants was then cultured in 5 ml LB without antibiotic and incubated overnight at 42 °C. A 10<sup>-6</sup> dilution of the cells were plated on LB and incubated at 30 °C. The loss of *kanR* and pCP20 was tested on LB without and with ampicillin, kanamycin after incubation at 30 °C.

Natural transformation of *B. subtilis* strains was carried out according to “Paris Method” (10). Unless otherwise specified, deletion or integration of the desired genes were usually performed based on introduction of an antibiotic selection marker into the target region of the chromosome of *B. subtilis* as listed in Table S1. Likewise, three markerless deletion systems were applied in this study. The first system was based on temperature sensitive plasmid pMW521.1 (7) and used for construction of KM273 and KM283. This plasmid contained the origin of replication and *rep* derived from pE194. *B. subtilis* strains transformed with the derivatives of pMW521.1 were selected on LB agar with spectinomycin at 50°C. At this temperature, the plasmid could not replicate; however, it could be integrated into the chromosome via the homologous recombination. Next, a single colony of the spectinomycin resistance transformants were inoculated into 5 ml LB medium and incubated for 24 h at 30 °C. In this step, the plasmid excised from the chromosome and wild-type or mutant strains were generated. Finally, the bacterial culture was diluted and plated on LB medium and further incubated at 50 °C. 50 – 100 colonies were tested on LB with and without spectinomycin at 30 °C and the spectinomycin sensitive colonies were further verified by colony PCR. In the second approach, markerless deletion was conducted using site specific recombination based on Cre-*mroxP* sites (5). Derivatives of pKAM19 (4), namely pKAM111 and pKAM315, harboring the *mroxP-cat-mroxP* cassette were used. For instance, after transformation of KM273 with pKAM111, the chloramphenicol resistance cells were selected to obtain strains

KM274. Next, strain KM274 was transformed with pJOE6732.1 expressing Cre recombinase by  $P_{xyIA}$  promoter. The spectinomycin sensitive transformants were then selected. A single colony of each KM274 containing pJOE6732.1 was inoculated into LB medium and incubated for 24 h at 37 °C. Since the pJOE6732.1 had a pAM $\beta$ 1 origin of replication, the plasmid was not stable. After incubation, the bacterial culture was plated on LB medium and up to 50 colonies were tested on LB medium with spectinomycin and chloramphenicol. The markerless deletion of the desired genes in the spectinomycin and chloramphenicol sensitive KM275 was verified by colony PCR. The third markerless deletion system was based on mannose sensitivity as described by M. Wenzel and J. Altenbuchner (11). In this method, pJOE7644.2 was used to construct strain KM297. Briefly, strain KM296 having an erythromycin resistance gene instead of the mannose utilization system (the *manPA* operon) was transformed with pJOE7644.2. The transformants were selected on spectinomycin. Next, a single colony of the transformants was inoculated into 5 ml LB medium with no antibiotic and the bacterial culture was incubated overnight at 37 °C. The bacterial culture was then inoculated into 5 ml LB containing 0.2% (w/v) mannose with a dilution of  $10^{-4}$ . After 5 h of incubate at 37 °C with 200 rpm shaking, a  $10^{-6}$  dilution of the culture was plated on LB with 0.2% (w/v) mannose. The loss of erythromycin and spectinomycin resistance genes were tested on LB plates with the mentioned antibiotics.

### **Protein purification by affinity chromatography**

*E. coli* JM109 carrying the respective recombinant plasmids pKAM322 (*ywpJ-Strep* tag) or pKAM327 (*ycaE-Strep* tag) were grown in LB medium containing ampicillin as explained in growth conditions. The cells were harvested by centrifugation, washed, and resuspended in 4 ml of resuspension buffer [100 mM Tris-HCl (pH 7.8), 150 mM NaCl, 1 mM tris(2-carboxyethyl)phosphine (TCEP)]. Bacterial cells were disrupted using ultrasonic sound (GM 2070; Bandelin Electronic, Berlin, Germany) three times for 30 s each at 100% duty cycle. The bacterial lysate was centrifuged for 30 min at  $20,200 \times g$  and 4°C. The cleared bacterial lysate was loaded onto 1 ml of *Strep*-Tactin Sepharose resin (IBA, Göttingen, Germany). Purification steps were performed according to the manufacturer's instructions. 2.5 mM desthiobiotin (*Strep*-tagged proteins) was added to the elution buffer, whereas 1 mM TCEP was added to all buffers used for purification. The GlcR-*Strep* tag was purified from *E. coli* JW2409-1 pKAM317 with some modification. Firstly, 100 ml of the bacterial culture was used for purification. The bacterial pellet

was resuspended in 10 ml of resuspension buffer and disrupted by EmulsiFlex<sup>®</sup>-C5 High Pressure Homogenizer (Avestin, Mannheim, Germany) at 15,000 psi. The crude extract was then centrifuged for 30 min at 12,000 × *g* and the cleared lysate was loaded onto resin. Secondly, 500 mM NaCl (instead of 150 mM) was used for elution of the protein since GlcR had a high affinity towards the *Strep*-Tactin Sepharose resin. The purified proteins were analyzed on SDS-polyacrylamide gel (12) and their concentration were measured according to M. M. Bradford (13).

### **Determination of the protein molecular weight by size-exclusion chromatography**

To determine the approximate molecular weight of GlcR and YwpJ, size-exclusion chromatography was carried out using purified proteins. Over-expression of *glcR* (without tag) was performed using strain JW2409-1 pKAM319 carrying the *rha*P<sub>BAD</sub>. Each cell pellet aliquot was resuspended in 100 mM Tris-HCl buffer (pH 7.8) and disrupted in a EmulsiFlex<sup>®</sup>-C5 high pressure homogenizer (Avestin, Ottawa, Canada). The bacterial lysate was then centrifuged for 30 min at 4°C at 26,890 × *g*. To degrade the DNA and RNA, 2 µl of Benzonase<sup>®</sup> Nuclease (25 U/µl) per 10 mg crude extract proteins was added to the bacterial cleared lysate in the presence of 20 mM MgCl<sub>2</sub> and incubated for 15 at room temperature. The cleared bacterial lysate containing 12 mg protein was loaded onto a heparin column (5 ml HiTrap Heparin HP; GE Healthcare) using a fast protein liquid chromatography (FPLC) system (Pharmacia Biotech, Uppsala, Sweden). The proteins were eluted by applying a linear gradient (0 – 100%) of 50 mM potassium phosphate buffer pH 7.0 (buffer A) and 1 M potassium phosphate buffer pH 7.0 (buffer B). SDS-PAGE analysis showed that GlcR was eluted at 35% of buffer B. YwpJ-*Strep* tag was purified from strain JW2409-1 pKAM322 by affinity chromatography as described before.

For size-exclusion chromatography, two TSK-GEL<sup>®</sup> G3000SW<sub>XL</sub> columns (7.8 mm ID × 30.0 cm L, 5 µm) (Tosoh Bioscience, Stuttgart, Germany) were connected to each other and to a high-performance liquid chromatography (HPLC) system (Merck Hitachi, Darmstadt, Germany) used at room temperature. The HPLC system consisted of an L-7100 pump, an L-7000 interface module, a Rheodyne sample injector 9725i with 100-µl sample loop, a D-7000 HPLC system manager software, and an S3205 UV-visible light (UV-Vis) detector (Sykam GmbH, Gilching, Germany). As the mobile phase, 300 mM potassium phosphate buffer (pH 7.0) with a flow rate of 0.5 ml/min was applied. The protein size standards were: RNase A (13.7 kDa), carbonic anhydrase (29 kDa), conalbumin (75 kDa) and blue dextran (2,000 kDa) from GE Healthcare (Uppsala,

Sweden) and myoglobin (17 kDa), ovalbumin (44 kDa) and  $\gamma$ -globulin (158 kDa) from BioRad (Munich, Germany). Twenty micrograms of each protein in a maximal volume of 50  $\mu$ l was injected for analysis.

### **DNA sequencing**

To perform primer extension and DNA footprinting, desired plasmids were sequenced using 5'-end Cy5-labelled oligonucleotides using Thermo Sequenase<sup>TM</sup> Cycle Sequencing Kit (Affymetrix, High Wycombe, UK). The reaction master mix was prepared by adding 2  $\mu$ l of the template plasmid (30 fmol/ $\mu$ l) to 2  $\mu$ l reaction buffer, 1  $\mu$ l oligonucleotide (4 pmol/ $\mu$ l), 1  $\mu$ l DMSO, 2  $\mu$ l DNA polymerase and 9.5  $\mu$ l ddH<sub>2</sub>O. Sanger sequencing reactions were prepared by adding 4  $\mu$ l of the master mix to separate aliquots (4  $\mu$ l) of ddATP, ddCTP, ddGTP and ddTTP. All reactions were carried out in a LifeECO BTC42096 PCR thermal cycler (Hangzhou Bioer Technology Co. Ltd., China). The PCR was run for 2 min at 95 °C, 30 cycles of (30 sec at 95 °C, 30 sec at (T<sub>m</sub>-5), 1 min at 72 °C) and the final extension of 1 min at 72 °C. Afterwards, 4  $\mu$ l of stop solution (ALFexpress AutoRead Sequencing Kit; GE Healthcare, Munich, Germany) was added to each reaction and 5  $\mu$ l of each reaction was loaded onto a polyacrylamide gel. The sequencing reaction was analyzed by ALFexpress II DNA sequencer (GE Healthcare).

### **Primer extension**

To determine the transcription start site of the *glcR-ywpJ* operon, primer extension was used with a Cy5-labelled oligonucleotide s8484. The s8484 primer was able to hybridize nucleotides 127 to 144 downstream of the *eGFP* start codon. Total RNA was extracted with Qiagen RNeasy mini kit (Hilden, Germany) from an overnight culture of strain KM473 pKAM320. Approximately 30  $\mu$ g of the total RNA in a total volume of 100  $\mu$ l was precipitated using 10  $\mu$ l of 3 M sodium acetate (pH 6.3) and 220  $\mu$ l ethanol. After centrifugation, the RNA pellet was washed twice with ethanol. The dried RNA pellet was dissolved in 5  $\mu$ l ddH<sub>2</sub>O and 0.5  $\mu$ l RNAsin (40 U/ $\mu$ l; Promega, Mannheim, Germany) was added to RNA and incubated for 3 min at 65°C. The reaction was cooled on ice and the hybridization was carried out by the addition of 0.5  $\mu$ l of primer s8484 (10 pmol/ $\mu$ l) and 2  $\mu$ l of the 5 $\times$  Avian myeloblastosis virus reverse transcriptase (AMV-RT) buffer. The reaction mixture was incubated at 56°C for 20 min followed by incubation at RT for 5 min. Reverse transcription reaction was accomplished with the addition of 1  $\mu$ l of 10 mM dNTP and 1  $\mu$ l of AMV-RT (20 U/ $\mu$ l; Roche, Mannheim, Germany). The reaction was carried out

for 1 h at 42°C and stopped using 5 µl stop solution (ALFexpress AutoRead Sequencing Kit; GE Healthcare, Munich, Germany). The reaction was incubated for 3 min at 80 and kept in -20 °C. 5 µl of the reaction was finally loaded on to the denaturing polyacrylamide sequencing gel (GE Healthcare). The final generated cDNA was compared with the sequencing bands of pKAM320 using s8484 as the sequencing primer.

### **Electrophoretic mobility shift assay (EMSA) and DNase I footprinting**

5'-end FITC-labelled or 5'-end Cy5-labelled DNA fragments were generated in PCRs using labelled oligonucleotides. FITC- $P_{groE}$  DNA was generated in PCR240 using s7098 and s10180 oligonucleotides and pKAM90 as a template. Oligonucleotides s9990 and s10180 were utilized to amplify the FITC- $P_{glcR}$  from pKAM312 in PCR238. DNA fragments were labelled with Cy5 to be used in EMSA and DNA footprinting. The coding strand of the  $P_{glcR}$  DNA was labelled in PCR248 (s9089 and SP6 oligonucleotides) from pKAM095, whereas PCR259 (s9990 and s10620 oligonucleotides) from pKAM312 was used for labelling non-coding strand. EMSA was carried out in a total volume of 20 µl containing 2 µl of the labelled DNA fragment (100 fmol/µl), 4 µl of 5× shift buffer [20 mM HEPES pH 7.4, 80 mM KCl, 1 mM TCEP, 8 mM MgCl<sub>2</sub>, 25% (w/v) glycerol, 0.25 mg/ml BSA, 0.025 mg/ml Herring sperm DNA] and the desired amount of protein. The effectors were also added to the reaction depending on the experiments. The reaction mixtures were incubated on ice for at least 15 min and all the reaction mixture was loaded onto a 6% (w/v) native polyacrylamide gel. The gel was run at 20 mA for 40 min to separate the DNA-protein complex from the free DNA. The migration of the DNA bands was visualized by a Phosphoimager (Storm 860 Phosphoimager, Molecular Dynamics).

The DNA binding site of GlcR within the  $P_{glcR}$  sequence was identified by DNase I footprinting. DNA footprinting master mix was prepared by mixing of 6 µl ddH<sub>2</sub>O, 12 µl shift buffer (5×) and 6 µl of PCR248 or PCR259 (100 fmol/µl). To each 24 µl of the master mix, 36 µl, 18 µl, 9 µl or 4.5 µl of GlcR-*Strep* tag (0.02 mg/ml) were added and the rest volume was filled with elution buffer of the GlcR-*Strep* tag purification up to 60 µl. To the negative control, only the elution buffer of the GlcR-*Strep* tag purification was added. The mixtures were incubated on ice for 15 min. Afterwards, the reactions were preheated in 25 °C and were started by the addition of 10 µl of the DNase I master mix containing 0.4 µl DNase I (2,000 U/ml; NEB, Frankfurt Germany), 7 µl of 10× DNase I buffer and 2.6 µl ddH<sub>2</sub>O. Each reaction was stopped after 1 min by adding 70

μl of stop solution [50 mM EDTA pH 8.0, 15 μg/ml Calf thymus DNA] and 140 μl phenol:chloroform:isoamylalcohol (25:24:1). The mixtures were then centrifuged and 100 μl of the upper phase was transferred into a new tube. Next, 200 μl ethanol was added to the 100 μl of the digested DNA and kept at -70 °C for 30 min. The precipitated DNA was washed once with ethanol and dissolved in 8 μl ddH<sub>2</sub>O. After addition of 4 μl stop solution (ALFexpress AutoRead Sequencing Kit; GE Healthcare, Munich, Germany), 5 μl of each reaction was loaded on the polyacrylamide gel. The results were analyzed with ALFexpress II DNA sequencer (GE Healthcare). To identify the GlcR binding site at the coding strand, pKAM095 was sequenced with s9089, whereas pKAM312 was sequenced with s10620 for the non-coding strand.

5'-end Cy5-labelled P<sub>merR</sub> DNA fragment was generated in a PCR using Cy5-labelled primer 1 and primer 2 from the linearized pJOE2083.2 with NdeI. The mobility shift assay was carried out as explained thoroughly before (14).



**TABLE S1** Strains used in this study. For all PCRs, the chromosomal DNA of *B. subtilis* 168 was added as the template.

| Strain                    | Genotype or description                                                                                                                                                                                                                                                                                                 | Reference, precursor, or method of construction |
|---------------------------|-------------------------------------------------------------------------------------------------------------------------------------------------------------------------------------------------------------------------------------------------------------------------------------------------------------------------|-------------------------------------------------|
| <b><i>E. coli</i> K12</b> |                                                                                                                                                                                                                                                                                                                         |                                                 |
| BL21(DE3)<br>/pLysS       | F <sup>-</sup> <i>ompT gal dcm lon hsdS<sub>B</sub>(r<sub>B</sub><sup>-</sup>m<sub>B</sub><sup>-</sup>)</i> λ(DE3 [ <i>lacI lacUV5-T7p07 ind1 sam7 nin5</i> ]) [ <i>malB</i> ] <sub>K-12</sub> (λ <sup>S</sup> )<br>pLysS[ <i>T7p20 ori<sub>p15A</sub></i> ](Cm <sup>R</sup> )                                          | Laboratory Stock                                |
| JM109                     | <i>recA1, endA1, gyrA96, thi-1, hsdR17</i> (r <sub>K</sub> <sup>-</sup> , m <sub>K</sub> <sup>+</sup> ), <i>mcrA, supE44, gyrA96, relA1, λ<sup>-</sup>, Δ(lac-proAB)</i> , F <sup>I</sup> ( <i>traD36, proAB<sup>+</sup>, lacI<sup>q</sup>, Δ(lacZ)</i> )M15)                                                           | (15)                                            |
| JW2409-1                  | Δ <i>ptsI745::kan, Δ(araD-araB)567, ΔlacZ4787(::rrnB-3), λ<sup>-</sup>, rph-1, Δ(rhaD-rhaB)568, hsdR514</i>                                                                                                                                                                                                             | (16)                                            |
| KM0433                    | Plasmid [ <i>ori<sub>pBR322</sub>, rhaP<sub>BAD</sub>-glcR-Strep tag, bla, rop</i> ]<br>Δ <i>ptsI745::kan, Δ(araD-araB)567, ΔlacZ4787(::rrnB-3), λ<sup>-</sup>, rph-1, Δ(rhaD-rhaB)568, hsdR514</i>                                                                                                                     | pKM317 → JW2409-1                               |
| KM0434                    | Plasmid [ <i>ori<sub>pBR322</sub>, rhaP<sub>BAD</sub>-Strep tag-glcR, bla, rop</i> ]<br>Δ <i>ptsI745::kan, Δ(araD-araB)567, ΔlacZ4787(::rrnB-3), λ<sup>-</sup>, rph-1, Δ(rhaD-rhaB)568, hsdR514</i>                                                                                                                     | pKM318 → JW2409-1                               |
| KM0435                    | Plasmid [ <i>ori<sub>pBR322</sub>, rhaP<sub>BAD</sub>-glcR, bla, rop</i> ]<br>Δ <i>ptsI745::kan, Δ(araD-araB)567, ΔlacZ4787(::rrnB-3), λ<sup>-</sup>, rph-1, Δ(rhaD-rhaB)568, hsdR514</i>                                                                                                                               | pKM319 → JW2409-1                               |
| KM0446                    | Δ <i>ptsI745, Δ(araD-araB)567, ΔlacZ4787(::rrnB-3), λ<sup>-</sup>, rph-1, Δ(rhaD-rhaB)568, hsdR514</i>                                                                                                                                                                                                                  | pCP20 → JW2409-1                                |
| KM0450                    | Plasmid [ <i>ori<sub>pBR322</sub>, rhaP<sub>BAD</sub>-glcR-Strep tag, bla, rop</i> ]<br>Δ <i>ptsI745, Δ(araD-araB)567, ΔlacZ4787(::rrnB-3), λ<sup>-</sup>, rph-1, Δ(rhaD-rhaB)568, hsdR514</i>                                                                                                                          | pKM317 → KM0446                                 |
| KM0451                    | Plasmid [ <i>ori<sub>pBR322</sub>, rhaP<sub>BAD</sub>-Strep tag-glcR, bla, rop</i> ]<br>Δ <i>ptsI745, Δ(araD-araB)567, ΔlacZ4787(::rrnB-3), λ<sup>-</sup>, rph-1, Δ(rhaD-rhaB)568, hsdR514</i>                                                                                                                          | pKM318 → KM0446                                 |
| KM0452                    | Plasmid [ <i>ori<sub>pBR322</sub>, rhaP<sub>BAD</sub>-glcR, bla, rop</i> ]<br>Δ <i>ptsI745, Δ(araD-araB)567, ΔlacZ4787(::rrnB-3), λ<sup>-</sup>, rph-1, Δ(rhaD-rhaB)568, hsdR514</i>                                                                                                                                    | pKM319 → KM0446                                 |
| KM0453                    | Plasmid [ <i>ori<sub>pBBR1MCS-2</sub>, mob, kanR, rep, ter-P<sub>glcR</sub>-TIR<sup>α</sup><sub>gsiB</sub>-eGFP</i> ]<br>Δ <i>ptsI745, Δ(araD-araB)567, ΔlacZ4787(::rrnB-3), λ<sup>-</sup>, rph-1, Δ(rhaD-rhaB)568, hsdR514</i>                                                                                         | pKAM321 → KM0446                                |
| KM0454                    | Plasmid [ <i>ori<sub>pBBR1MCS-2</sub>, mob, kanR, rep, ter-P<sub>glcR</sub>-TIR<sup>α</sup><sub>gsiB</sub>-eGFP</i> ]<br>Plasmid [ <i>ori<sub>pBR322</sub>, rhaP<sub>BAD</sub>-glcR-Strep tag, bla, rop</i> ]<br>Δ <i>ptsI745, Δ(araD-araB)567, ΔlacZ4787(::rrnB-3), λ<sup>-</sup>, rph-1, Δ(rhaD-rhaB)568, hsdR514</i> | pKAM321 → KM0450                                |
| KM0455                    | Plasmid [ <i>ori<sub>pBBR1MCS-2</sub>, mob, kanR, rep, ter-P<sub>glcR</sub>-TIR<sup>α</sup><sub>gsiB</sub>-eGFP</i> ]<br>Plasmid [ <i>ori<sub>pBR322</sub>, rhaP<sub>BAD</sub>-Strep tag-glcR, bla, rop</i> ]<br>Δ <i>ptsI745, Δ(araD-araB)567, ΔlacZ4787(::rrnB-3), λ<sup>-</sup>, rph-1, Δ(rhaD-rhaB)568, hsdR514</i> | pKAM321 → KM0451                                |
| KM0456                    | Plasmid [ <i>ori<sub>pBBR1MCS-2</sub>, mob, kanR, rep, ter-P<sub>glcR</sub>-TIR<sup>α</sup><sub>gsiB</sub>-eGFP</i> ]<br>Plasmid [ <i>ori<sub>pBR322</sub>, rhaP<sub>BAD</sub>-glcR, bla, rop</i> ]                                                                                                                     | pKAM321 → KM0452                                |

| Strain                    | Genotype or description                                                                                                                        | Reference, precursor, or method of construction |
|---------------------------|------------------------------------------------------------------------------------------------------------------------------------------------|-------------------------------------------------|
|                           | $\Delta ptsI745$ , $\Delta(araD-araB)567$ , $\Delta lacZ4787(::rrnB-3)$ , $\lambda^-$ , <i>rph-1</i> , $\Delta(rhaD-rhaB)568$ , <i>hsdR514</i> |                                                 |
| <b><i>B. subtilis</i></b> |                                                                                                                                                |                                                 |
| BKE12000                  | <i>trpC2</i> $\Delta manR::loxP-ermC-loxP$                                                                                                     | (17)                                            |
| BKE03990                  | <i>trpC2</i> $\Delta mtlD::loxP-ermC-loxP$                                                                                                     | (17)                                            |
| BKE36290                  | <i>trpC2</i> $\Delta ywpJ::loxP-ermC-loxP$                                                                                                     | (17)                                            |
| BKE36300                  | <i>trpC2</i> $\Delta glcR::loxP-ermC-loxP$                                                                                                     | (17)                                            |
| KM0                       | <i>trp</i> <sup>+</sup> derivative of 168                                                                                                      | (18)                                            |
| KM273                     | $\Delta malA$                                                                                                                                  | pKAM227 → KM0                                   |
| KM274                     | $\Delta malA \Delta mtlD::mroxP-cat-mroxP$                                                                                                     | pKAM111 → KM273                                 |
| KM275                     | $\Delta malA \Delta mtlD::mrmrP$                                                                                                               | pJOE6732.1 → KM274                              |
| KM283                     | $\Delta malA \Delta mtlD::mrmrP \Delta manA$                                                                                                   | pKAM226 → KM275                                 |
| KM296                     | $\Delta manPA::ermC$                                                                                                                           | pJOE6577.1 → KM0                                |
| KM297                     | $\Delta manPA$                                                                                                                                 | pJOE7644.2 → KM296                              |
| KM387                     | <i>trpC2</i> $\Delta mtlD::loxP$                                                                                                               | pJOE6732.1 → BKE03990                           |
| KM405                     | $\Delta mtlD::loxP$                                                                                                                            | pKAM041 → KM387                                 |
| KM470                     | $\Delta glcR::loxP-ermC-loxP$                                                                                                                  | pKAM041 → BKE36300                              |
| KM471                     | $\Delta ywpJ::loxP-ermC-loxP$                                                                                                                  | pKAM041 → BKE36290                              |
| KM473                     | $\Delta glcR::loxP$                                                                                                                            | pJOE6732.1 → KM470                              |
| KM474                     | $\Delta ywpJ::loxP$                                                                                                                            | pJOE6732.1 → KM471                              |
| KM475                     | <i>amyE</i> ::[P <sub>glcR</sub> - <i>lacZ</i> , <i>spcR</i> ]                                                                                 | pKAM312 → KM0                                   |
| KM477                     | $\Delta glcR::loxP$ <i>amyE</i> ::[P <sub>glcR</sub> - <i>lacZ</i> , <i>spcR</i> ]                                                             | pKAM312 → KM473                                 |
| KM479                     | $\Delta ywpJ::loxP$ <i>amyE</i> ::[P <sub>glcR</sub> - <i>lacZ</i> , <i>spcR</i> ]                                                             | pKAM312 → KM474                                 |
| KM495                     | $\Delta malA \Delta mtlD::mrmrP \Delta manA$ <i>amyE</i> ::[P <sub>glcR</sub> - <i>lacZ</i> , <i>spcR</i> ]                                    | pKAM312 → KM283                                 |
| KM498                     | $\Delta malA \Delta mtlD::mrmrP \Delta manA \Delta glcR::loxP-ermC-loxP$                                                                       | gDNA <sup>B</sup> BKE36300 → KM283              |
| KM499                     | $\Delta malA \Delta mtlD::mrmrP \Delta manA \Delta glcR::loxP$                                                                                 | pJOE6732.1 → KM498                              |
| KM500                     | $\Delta malA \Delta mtlD::mrmrP \Delta manA \Delta ywpJ::loxP-ermC-loxP$                                                                       | gDNA BKE36290 → KM283                           |
| KM501                     | $\Delta malA \Delta mtlD::mrmrP \Delta manA \Delta ywpJ::loxP$                                                                                 | pJOE6732.1 → KM500                              |
| KM502                     | $\Delta malA \Delta mtlD::mrmrP \Delta manA \Delta glcRywpJ::mroxP-cat-mroxP$                                                                  | pKAM315 → KM283                                 |

| Strain | Genotype or description                                                                         | Reference, precursor, or method of construction |
|--------|-------------------------------------------------------------------------------------------------|-------------------------------------------------|
| KM503  | $\Delta malA \Delta mtlD::mrmrP \Delta manA \Delta glcRywpJ::mrmrP$                             | pJOE6732.1 → KM502                              |
| KM508  | $\Delta malA \Delta mtlD::mrmrP \Delta manA \Delta glcRywpJ::mrmrP amyE::[P_{glcR-lacZ}, spcR]$ | pKAM312 → KM503                                 |
| KM510  | $\Delta glcRywpJ::mrmrP amyE::[P_{glcR-lacZ}, spcR]$                                            | pKAM312 → KM513                                 |
| KM511  | $\Delta glcRywpJ::mrmrP amyE::[P_{glcT-lacZ}, spcR]$                                            | pKAM313 → KM513                                 |
| KM512  | $\Delta glcR-ywpJ::mroxP-cat-mroxP$                                                             | pKAM315 → KM0                                   |
| KM513  | $\Delta glcR-ywpJ::mrmrP$                                                                       | pJOE6732.1 → KM512                              |
| KM617  | $amyE::[P_{glcR-s1-lacZ}, spcR]$                                                                | pKAM329 → KM0                                   |
| KM618  | $amyE::[P_{glcR-s2-lacZ}, spcR]$                                                                | pKAM330 → KM0                                   |
| KM641  | $\Delta mtlD::loxP amyE::[P_{glcR-lacZ}, spcR]$                                                 | pKAM312 → KM405                                 |
| KM642  | $\Delta manA$                                                                                   | pKAM226 → KM0                                   |
| KM643  | $\Delta manA amyE::[P_{glcR-lacZ}, spcR]$                                                       | pKAM312 → KM642                                 |
| KM644  | $\Delta malA amyE::[P_{glcR-lacZ}, spcR]$                                                       | pKAM312 → KM273                                 |
| KM647  | $\Delta manPA amyE::[P_{glcR-lacZ}, spcR]$                                                      | pKAM312 → KM297                                 |
| KM683  | $\Delta glcR::loxP amyE::[P_{glcR-s1-lacZ}, spcR]$                                              | pKAM329 → KM473                                 |
| KM684  | $\Delta glcR::loxP amyE::[P_{glcR-s2-lacZ}, spcR]$                                              | pKAM330 → KM473                                 |
| KM699  | $\Delta manA \Delta manR::loxP-ermC-loxP$                                                       | gDNA BKE12000 → KM642                           |
| KM704  | $\Delta manA \Delta manR::loxP$                                                                 | pJOE6732.1 → KM699                              |
| KM709  | $\Delta manA \Delta manR::loxP-ermC-loxP amyE::[P_{glcR-lacZ}, spcR]$                           | pKAM312 → KM699                                 |
| KM710  | $\Delta manA \Delta manR::loxP amyE::[P_{glcR-lacZ}, spcR]$                                     | pKAM312 → KM704                                 |
| KM772  | $amyE::[P_{glcR-s3-lacZ}, spcR]$                                                                | pKAM360 → KM0                                   |
| KM773  | $amyE::[P_{glcR-s4-lacZ}, spcR]$                                                                | pKAM361 → KM0                                   |
| KM774  | $amyE::[P_{glcR-s5-lacZ}, spcR]$                                                                | pKAM362 → KM0                                   |
| KM775  | $\Delta glcR::loxP amyE::[P_{glcR-s3-lacZ}, spcR]$                                              | pKAM360 → KM473                                 |
| KM776  | $\Delta glcR::loxP amyE::[P_{glcR-s4-lacZ}, spcR]$                                              | pKAM361 → KM473                                 |
| KM777  | $\Delta glcR::loxP amyE::[P_{glcR-s5-lacZ}, spcR]$                                              | pKAM362 → KM473                                 |

<sup>α</sup> Translational start site

<sup>β</sup> genomic DNA

**TABLE S2** Plasmids used in this study. For all PCRs, the chromosomal DNA of *B. subtilis* 168 was added as the template.

| Plasmid                   | Genotype or description                                                                                                                                                                                           | Vector<br>(cut)      | Insert<br>(cut)      | Reference, precursor, or method of<br>construction |
|---------------------------|-------------------------------------------------------------------------------------------------------------------------------------------------------------------------------------------------------------------|----------------------|----------------------|----------------------------------------------------|
| Parental plasmids         |                                                                                                                                                                                                                   |                      |                      |                                                    |
| pBBR1MCS-2                | <i>ori</i> <sub>pBBR1MCS-2</sub> , <i>rep</i> , <i>mob</i> , <i>kanR</i>                                                                                                                                          |                      |                      | (19)                                               |
| pCP20                     | <i>ori</i> <sub>R101</sub> , <i>cI857</i> <sup>ts</sup> , <i>repA101</i> <sup>ts</sup> , <i>bla</i> , <i>cat</i> , $\lambda$ P <sub>R-<i>flp</i></sub>                                                            |                      |                      | (9)                                                |
| pJOE971C17                | <i>ori</i> <sub>pBR322</sub> , T7- <i>merR</i>                                                                                                                                                                    |                      |                      | (20)                                               |
| pJOE2083.2                | <i>ori</i> <sub>pBR322</sub> , operator <sub><i>merR</i></sub>                                                                                                                                                    |                      |                      | (14)                                               |
| pJOE4786.1                | <i>ori</i> <sub>pUC18</sub> , <i>bla</i> , <i>lacPOZ'</i>                                                                                                                                                         |                      |                      | (2)                                                |
| pJOE6089.4                | <i>ori</i> <sub>pBR322</sub> , <i>rop</i> , <i>bla</i> , <i>rha</i> P <sub>BAD</sub> - <i>eGFP-Strep tag-ter</i> <sub><i>rrnB</i></sub>                                                                           |                      |                      | (3)                                                |
| pJOE6090.1                | <i>ori</i> <sub>pBR322</sub> , <i>rop</i> , <i>bla</i> , <i>rha</i> P <sub>BAD</sub> - <i>Strep tag-eGFP-ter</i> <sub><i>rrnB</i></sub>                                                                           |                      |                      | (3)                                                |
| pJOE6577.1                | <i>ori</i> <sub>pUC18</sub> , <i>bla</i> , <i>spcR</i> , [ <i>'manR-manP-ermC-yjdF</i> ]                                                                                                                          |                      |                      | (11)                                               |
| pJOE6732.1                | <i>ori</i> <sub>pAMβ1</sub> , <i>repDE</i> , P <sub><i>xyIA-creP1</i></sub> , <i>spcR</i> , <i>ori</i> <sub>pUC18</sub> , <i>bla</i>                                                                              |                      |                      | (6)                                                |
| pJOE7644.2                | <i>ori</i> <sub>pUC18</sub> , <i>spcR</i> , <i>bla</i> , P <sub><i>manP-manP</i></sub> , [ <i>'manR-manP-yjdF</i> ]                                                                                               |                      |                      | Altenbuchner (unpublished)                         |
| pKAM020                   | <i>ori</i> <sub>pUC18</sub> , <i>bla</i> , [ <i>mtlA'-mroxP-cat-mroxP</i> ]                                                                                                                                       |                      |                      | (8)                                                |
| pKAM041                   | <i>ori</i> <sub>pUC18</sub> , <i>bla</i> , [ <i>ter'-trpD-trpC-trpF'-ter</i> ]                                                                                                                                    |                      |                      | (18)                                               |
| pKAM19                    | <i>ori</i> <sub>pUC18</sub> , <i>bla</i> , [ <i>mroxP-cat-mroxP</i> ]                                                                                                                                             |                      |                      | (4)                                                |
| pKAM90                    | <i>ori</i> <sub>pUC18</sub> , <i>ori</i> <sub>pBS72</sub> , <i>spc</i> , <i>ter</i> - P <sub><i>groE</i></sub> -( <i>cre</i> <sub><i>acsA</i></sub> )-UTR <sub><i>PmtlR</i></sub> - <i>lacZ-ter</i> , <i>repA</i> |                      |                      | (21)                                               |
| pKAM263                   | <i>ori</i> <sub>pBR322</sub> , <i>bla</i> , <i>rop</i> , <i>ermC</i> , <i>amyE'</i> -[ <i>ter</i> -P <sub><i>mtlA</i></sub> - <i>lacZ</i> , <i>spcR</i> ]- <i>'amyE</i>                                           |                      |                      | (8)                                                |
| pKAM312                   | <i>ori</i> <sub>pUC18</sub> , <i>bla</i> , <i>rop</i> , <i>ermC</i> , <i>amyE'</i> -[ <i>ter</i> -P <sub><i>glcR</i></sub> - <i>lacZ</i> , <i>spcR</i> ]- <i>'amyE</i>                                            |                      |                      | (8)                                                |
| pMW521.1                  | <i>ori</i> <sub>pEI94</sub> , <i>ori</i> <sub>pUC18</sub> , <i>spcR</i> , <i>ter</i> -MCS <sup>a</sup> - <i>ter</i>                                                                                               |                      |                      | (7)                                                |
| Constructed in this study |                                                                                                                                                                                                                   |                      |                      |                                                    |
| pKAM095                   | <i>ori</i> <sub>pUC18</sub> , <i>bla</i> , P <sub><i>glcR</i></sub>                                                                                                                                               |                      |                      | P <sub><i>glcR</i></sub> → pJOE4786.1              |
| pKAM097                   | <i>ori</i> <sub>pUC18</sub> , <i>bla</i> , <i>ssbB</i>                                                                                                                                                            | pJOE4786.1<br>(SmaI) | PCR<br>s9996-s9997   | <i>ssbB</i> → pJOE4786.1                           |
| pKAM098                   | <i>ori</i> <sub>pUC18</sub> , <i>bla</i> , <i>ywqA</i>                                                                                                                                                            | pJOE4786.1<br>(SmaI) | PCR<br>s9998-s9999   | <i>ywqA</i> → pJOE4786.1                           |
| pKAM0100                  | <i>ori</i> <sub>pUC18</sub> , <i>bla</i> , <i>glcR</i>                                                                                                                                                            | pJOE4786.1<br>(SmaI) | PCR<br>s10149-s10150 | <i>glcR</i> → pJOE4786.1                           |
| pKAM0101                  | <i>ori</i> <sub>pUC18</sub> , <i>bla</i> , <i>glcR</i>                                                                                                                                                            | pJOE4786.1<br>(SmaI) | PCR<br>s10151-s10152 | <i>glcR</i> → pJOE4786.1                           |

| Plasmid  | Genotype or description                                                                                                  | Vector (cut)          | Insert (cut)                                                                       | Reference, precursor, or method of construction |
|----------|--------------------------------------------------------------------------------------------------------------------------|-----------------------|------------------------------------------------------------------------------------|-------------------------------------------------|
| pKAM0102 | <i>ori<sub>pUC18</sub></i> , <i>bla</i> , <i>glcR</i>                                                                    | pJOE4786.1 (SmaI)     | PCR s10149-s10161                                                                  | <i>glcR</i> → pJOE4786.1                        |
| pKAM0103 | <i>ori<sub>pUC18</sub></i> , <i>bla</i> , <i>ywpJ</i>                                                                    | pJOE4786.1 (SmaI)     | PCR s10204-s10205                                                                  | <i>ywpJ</i> → pJOE4786.1                        |
| pKAM0107 | <i>ori<sub>pUC18</sub></i> , <i>bla</i> , P <sub><i>glcR-s1</i></sub>                                                    | pJOE4786.1 (SmaI)     | PCR s10327-s9991                                                                   | P <sub><i>glcR-s1</i></sub> → pJOE4786.1        |
| pKAM0108 | <i>ori<sub>pUC18</sub></i> , <i>bla</i> , P <sub><i>glcR-s2</i></sub>                                                    | pJOE4786.1 (SmaI)     | PCR s10328-s9991                                                                   | P <sub><i>glcR-s2</i></sub> → pJOE4786.1        |
| pKAM0110 | <i>ori<sub>pUC18</sub></i> , <i>bla</i> , <i>ycsE</i>                                                                    | pJOE4786.1 (SmaI)     | PCR s10547-s10498                                                                  | <i>ycsE</i> → pJOE4786.1                        |
| pKAM0120 | <i>ori<sub>pUC18</sub></i> , <i>bla</i> , P <sub><i>glcR-s3</i></sub>                                                    | pJOE4786.1 (SmaI)     | PCR s11007-s9991                                                                   | P <sub><i>glcR-s3</i></sub> → pJOE4786.1        |
| pKAM0121 | <i>ori<sub>pUC18</sub></i> , <i>bla</i> , P <sub><i>glcR-s4</i></sub>                                                    | pJOE4786.1 (SmaI)     | PCR s11008-s9991                                                                   | P <sub><i>glcR-s4</i></sub> → pJOE4786.1        |
| pKAM0122 | <i>ori<sub>pUC18</sub></i> , <i>bla</i> , P <sub><i>glcR-s5</i></sub>                                                    | pJOE4786.1 (SmaI)     | PCR s11009-s9991                                                                   | P <sub><i>glcR-s5</i></sub> → pJOE4786.1        |
| pKAM97   | <i>ori<sub>pUC18</sub></i> , <i>bla</i> , [ <i>mtlA'</i> - <i>mroxP-cat-mroxP-ycsA'</i> ]                                | pKAM020 (NheI-SacI)   | PCR s7187-s7188 (NheI-SacI)                                                        | This study                                      |
| pKAM111  | <i>ori<sub>pUC18</sub></i> , <i>bla</i> , [ <i>mtlF'</i> - <i>mroxP-cat-mroxP-ycsA'</i> ]                                | pKAM97 (BamHI-XhoI)   | PCR s7341-s7342 (BamHI-XhoI)                                                       | This study                                      |
| pKAM226  | <i>ori<sub>pEI94</sub></i> , <i>ori<sub>pUC18</sub></i> , <i>spcR</i> , [ <i>ter'</i> - <i>manP-yjdf'</i> - <i>ter</i> ] | pMW521.1 (BamHI-XmaI) | Primary PCRs s8656-s8657 and s8658-s8659<br>Fusion PCR s8656-s8659<br>(BamHI-XmaI) | This study                                      |
| pKAM227  | <i>ori<sub>pEI94</sub></i> , <i>ori<sub>pUC18</sub></i> , <i>spcR</i> , [ <i>ter'</i> - <i>yjfa-malR'</i> - <i>ter</i> ] | pMW521.1 (BamHI-XmaI) | Primary PCRs s8660-s8661 and s8662-s8663<br>Fusion PCR                             | This study                                      |

| Plasmid | Genotype or description                                                                                                                                                                        | Vector (cut)                  | Insert (cut)                                           | Reference, precursor, or method of construction                                      |
|---------|------------------------------------------------------------------------------------------------------------------------------------------------------------------------------------------------|-------------------------------|--------------------------------------------------------|--------------------------------------------------------------------------------------|
| pKAM314 | <i>ori</i> <sub>pUC18</sub> , <i>bla</i> , [ <i>ssbB-mroxP-cat-mroxP</i> ]                                                                                                                     | pKAM19<br>(BamHI-XhoI)        | s8660-s8663<br>(BamHI-XmaI)<br>pKAM097<br>(BamHI-XhoI) | <i>ssbB</i> → pKAM19                                                                 |
| pKAM315 | <i>ori</i> <sub>pUC18</sub> , <i>bla</i> , [ <i>ssbB-mroxP-cat-mroxP-ywqA</i> ]                                                                                                                | pKAM314<br>(EcoRI-NheI)       | pKAM098<br>(EcoRI-NheI)                                | <i>ywqA</i> → pKAM314                                                                |
| pKAM317 | <i>ori</i> <sub>pBR322</sub> , <i>rop</i> , <i>bla</i> , <i>rhaP</i> <sub>BAD</sub> - <i>glcR-Strep tag-ter</i> <sub>rrmB</sub>                                                                | pJOE6089.4<br>(NdeI-BamHI)    | pKAM0100<br>(NdeI-BamHI)                               | <i>glcR</i> → pJOE6089.4                                                             |
| pKAM318 | <i>ori</i> <sub>pBR322</sub> , <i>rop</i> , <i>bla</i> , <i>rhaP</i> <sub>BAD</sub> - <i>Strep tag-glcR-ter</i> <sub>rrmB</sub>                                                                | pJOE6090.1<br>(BamHI-HindIII) | pKAM0101<br>(BamHI-HindIII)                            | <i>glcR</i> → pJOE6090.1                                                             |
| pKAM319 | <i>ori</i> <sub>pBR322</sub> , <i>rop</i> , <i>bla</i> , <i>rhaP</i> <sub>BAD</sub> - <i>glcR-ter</i> <sub>rrmB</sub>                                                                          | pJOE6089.4<br>(NdeI-XmaI)     | pKAM0102<br>(NdeI-XmaI)                                | <i>glcR</i> → pJOE6089.4                                                             |
| pKAM320 | <i>ori</i> <sub>pUC18</sub> , <i>ori</i> <sup>+</sup> <sub>pUB110</sub> , <i>rep</i> <sub>pUB110</sub> , <i>spcR</i> , <i>ter-P</i> <sub>glcR</sub> - <i>TIR</i> <sub>gsiB</sub> - <i>eGFP</i> | pKAM114<br>(AgeI-NdeI)        | pKAM095<br>(AgeI-NdeI)                                 | <i>P</i> <sub>glcR</sub> → pKAM114                                                   |
| pKAM321 | <i>ori</i> <sub>pBBR1MCS-2</sub> , <i>rep</i> , <i>mob</i> , <i>kanR</i> , <i>ter-P</i> <sub>glcR</sub> - <i>TIR</i> <sub>gsiB</sub> - <i>eGFP</i>                                             | pBBR1MCS-2<br>(PvuI-XmaI)     | pKAM320<br>(PacI-XmaI)                                 | <i>ter-P</i> <sub>glcR</sub> - <i>TIR</i> <sub>gsiB</sub> - <i>eGFP</i> → pBBR1MCS-2 |
| pKAM322 | <i>ori</i> <sub>pBR322</sub> , <i>rop</i> , <i>bla</i> , <i>rhaP</i> <sub>BAD</sub> - <i>ywpJ-Strep tag-ter</i> <sub>rrmB</sub>                                                                | pJOE6089.4<br>(NdeI-BamHI)    | pKAM0103<br>(NdeI-BamHI)                               | <i>ywpJ</i> → pJOE6089.4                                                             |
| pKAM327 | <i>ori</i> <sub>pBR322</sub> , <i>rop</i> , <i>bla</i> , <i>rhaP</i> <sub>BAD</sub> - <i>ycsE-Strep tag-ter</i> <sub>rrmB</sub>                                                                | pJOE6089.4<br>(NdeI-BamHI)    | pKAM0110<br>(NdeI-BamHI)                               | <i>ycsE</i> → pJOE6089.4                                                             |
| pKAM329 | <i>ori</i> <sub>pBR322</sub> , <i>bla</i> , <i>rop</i> , <i>ermC</i> , <i>amyE'</i> -[ <i>ter-P</i> <sub>glcR-s1</sub> - <i>lacZ</i> , <i>spcR</i> ]-' <i>amyE</i>                             | pKAM263<br>(NheI-NdeI)        | pKAM0107<br>(NheI-NdeI)                                | <i>P</i> <sub>glcR-s1</sub> → pKAM263                                                |
| pKAM330 | <i>ori</i> <sub>pBR322</sub> , <i>bla</i> , <i>rop</i> , <i>ermC</i> , <i>amyE'</i> -[ <i>ter-P</i> <sub>glcR-s2</sub> - <i>lacZ</i> , <i>spcR</i> ]-' <i>amyE</i>                             | pKAM263<br>(NheI-NdeI)        | pKAM0108<br>(NheI-NdeI)                                | <i>P</i> <sub>glcR-s2</sub> → pKAM263                                                |
| pKAM360 | <i>ori</i> <sub>pBR322</sub> , <i>bla</i> , <i>rop</i> , <i>ermC</i> , <i>amyE'</i> -[ <i>ter-P</i> <sub>glcR-s3</sub> - <i>lacZ</i> , <i>spcR</i> ]-' <i>amyE</i>                             | pKAM263<br>(NheI-NdeI)        | pKAM0120<br>(NheI-NdeI)                                | <i>P</i> <sub>glcR-s3</sub> → pKAM263                                                |
| pKAM361 | <i>ori</i> <sub>pBR322</sub> , <i>bla</i> , <i>rop</i> , <i>ermC</i> , <i>amyE'</i> -[ <i>ter-P</i> <sub>glcR-s4</sub> - <i>lacZ</i> , <i>spcR</i> ]-' <i>amyE</i>                             | pKAM263<br>(NheI-NdeI)        | pKAM0121<br>(NheI-NdeI)                                | <i>P</i> <sub>glcR-s4</sub> → pKAM263                                                |
| pKAM362 | <i>ori</i> <sub>pBR322</sub> , <i>bla</i> , <i>rop</i> , <i>ermC</i> , <i>amyE'</i> -[ <i>ter-P</i> <sub>glcR-s5</sub> - <i>lacZ</i> , <i>spcR</i> ]-' <i>amyE</i>                             | pKAM263<br>(NheI-NdeI)        | pKAM0122<br>(NheI-NdeI)                                | <i>P</i> <sub>glcR-s5</sub> → pKAM263                                                |

<sup>a</sup> Multiple cloning site

**TABLE S3** Oligonucleotides used in this study.

| Name   | Sequence (5' → 3')                                | Application                        |
|--------|---------------------------------------------------|------------------------------------|
| s7098  | AAA AAA GCT AGC AGC TAT TGT AAC ATA ATC GGT       | Amplification of P <sub>groE</sub> |
| s7187  | AAA AAA GCTAGC CCG ACC ACC CGT GAC A              | Markerless deletion of <i>mtlD</i> |
| s7188  | AAA AAA GAGCTC ACC TTC ACT GTT CTC GCG            | Markerless deletion of <i>mtlD</i> |
| s7341  | AAA AAA GGATCC ATT TCA TTG CCA TTC CAC A          | Markerless deletion of <i>mtlD</i> |
| s7342  | AAA AAA CTCGAG TCA GTT CAC CTC GTT GAA A          | Markerless deletion of <i>mtlD</i> |
| s8656  | AAA AAA GGA TCC TGT TTG GAT CGG CAA TG            | Markerless deletion of <i>manA</i> |
| s8657  | TCA AGC CCT GCC ATG TTA CAT GAA AAT CCC CCG CT    | Markerless deletion of <i>manA</i> |
| s8658  | AGC GGG GGA TTT TCA TGT AAC ATG GCA GGG CTT GA    | Markerless deletion of <i>manA</i> |
| s8659  | AAA AAA CCC GGG TCT GTG CTT CTT TTT CGC T         | Markerless deletion of <i>manA</i> |
| s8660  | AAA AAA GGA TCC TCC TCT CTT GCT TTA CGC T         | Markerless deletion of <i>mala</i> |
| s8661  | ATG GGG GAA TTT CAT TTA CAT ATG ACG ACC TCC TTG A | Markerless deletion of <i>mala</i> |
| s8662  | TCA AGG AGG TCG TCA TAT GTA AAT GAA ATT CCC CCA T | Markerless deletion of <i>mala</i> |
| s8663  | AAA AAA CCC GGG CAA CGA GAA AAA ACG GTG           | Markerless deletion of <i>mala</i> |
| s9990  | AAA AAA GCT AGC ACC GGT CAC CCC TGC TCC TCC CGT   | Amplification of P <sub>glcR</sub> |
| s9991  | AAA AAA CAT ATG CTC ATT CCT TTT CTC AGC A         | Amplification of P <sub>glcR</sub> |
| s9996  | AAA AAA GGA TCC TTC GCT ACA CTT CCG CC            | Amplification of <i>ssbB</i>       |
| s9997  | AAA AAA CTC GAG CAC GCC CTC ATT CCT TT            | Amplification of <i>ssbB</i>       |
| s9998  | AAA AAA GAA TTC TAA GTA TAT GTG CTG CCA CAA       | Amplification of <i>ywqA</i>       |
| s9999  | AAA AAA GCT AGC GAC CAT ATG ACA TCC CTG AC        | Amplification of <i>ywqA</i>       |
| s10149 | AAA AAA CAT ATG TAC CAA GAA GAA AGA TTA GTA G     | Amplification of <i>glcR</i>       |
| s10150 | AAA AAA GGA TCC GTC CTT TCC TTC ATC CTG C         | Amplification of <i>glcR</i>       |
| s10151 | AAA AAA GGA TCC GTG TAC CAA GAA GAA AGA TTA GTA G | Amplification of <i>glcR</i>       |
| s10152 | AAA AAA AAG CTT TCA GTC CTT TCC TTC ATC CTG C     | Amplification of <i>glcR</i>       |
| s10161 | AAA AAA CCC GGG TCA GTC CTT TCC TTC ATC CTG C     | Amplification of <i>glcR</i>       |

|                                  |                                                                 |                                               |
|----------------------------------|-----------------------------------------------------------------|-----------------------------------------------|
| s10204                           | AAA AAA CAT ATG AAA TTA ATT GCG ATT GAC                         | Amplification of <i>ywpJ</i>                  |
| s10205                           | AAA AAA GGA TCC CAA CAA ATG TTT CAT CAT GTG TGC GAC ACC GTG TTC | Amplification of <i>ywpJ</i>                  |
| s10327                           | AAA AAA GCT AGC ACC GGT TAC TTA AAA TCA CTT ATT AAT GTT G       | Amplification of P <sub><i>glcR</i></sub> -s1 |
| s10328                           | AAA AAA GCT AGC ACC GGT AAT GTT GAA TAA AAT CAA ATA AAA         | Amplification of P <sub><i>glcR</i></sub> -s2 |
| s10498                           | AAA AAA GGA TCC TAG TAC CCA ATG GCG AAT                         | Amplification of <i>ycsE</i>                  |
| s10547                           | AAA AAA CAT ATG TCT GTT CAA AGA GAA GAT G                       | Amplification of <i>ycsE</i>                  |
| s11007                           | AAA AAA GCT AGC ACC GGT CTC GAC GCA TTT TTA CTT A               | Amplification of P <sub><i>glcR</i></sub> -s3 |
| s11008                           | AAA AAA GCT AGC ACC GGT ACG CAT TTT TAC TTA AAA TCA CT          | Amplification of P <sub><i>glcR</i></sub> -s4 |
| s11009                           | AAA AAA GCT AGC ACC GGT TTT TAC TTA AAA TCA CTT ATT AAT GT      | Amplification of P <sub><i>glcR</i></sub> -s5 |
| <b>Labelled oligonucleotides</b> |                                                                 |                                               |
| s8484                            | Cy5-CTT GCC GTA GGT GGC ATC                                     | Primer extension                              |
| s9089                            | Cy5-TAA TAC GAC TCA CTA TAG GG                                  | DNA footprinting                              |
| s10180                           | FITC-CCA GTC ACG ACG TTG TAA AAC                                | Electrophoretic mobility shift assay          |
| s10620                           | Cy5-CGG GCC TCT TCG CTA TTA C                                   | DNA footprinting                              |
| Primer 1                         | Cy5-CAG GAA ACA GCT ATG AC                                      | Electrophoretic mobility shift assay          |
| Primer 2                         | Cy5-TGT AAA ACG ACG GCC AGT                                     | Electrophoretic mobility shift assay          |

---



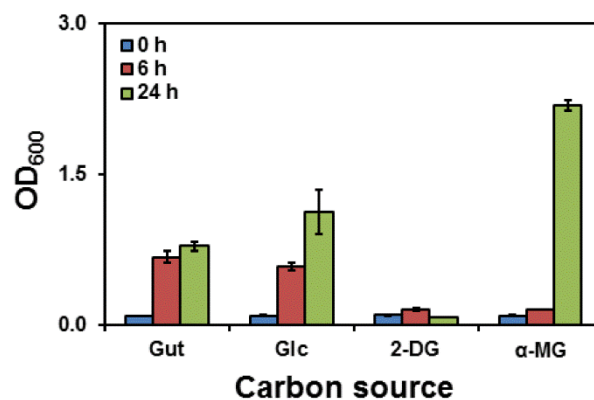

**FIG S1 Growth of *B. subtilis* with glucose or its analogs as the sole carbon source.** Growth of strain KM0 in Spizizen's minimal medium (without citrate) with 0.5% (w/v) of glucitol (Gut), glucose (Glc), 2-deoxy-D-glucose (2-DG) or methyl  $\alpha$ -D-glucopyranoside ( $\alpha$ -MG) as the sole carbon source was investigated. The experiments were carried out in triplicates and the mean values and standard deviations (error bar) are demonstrated.

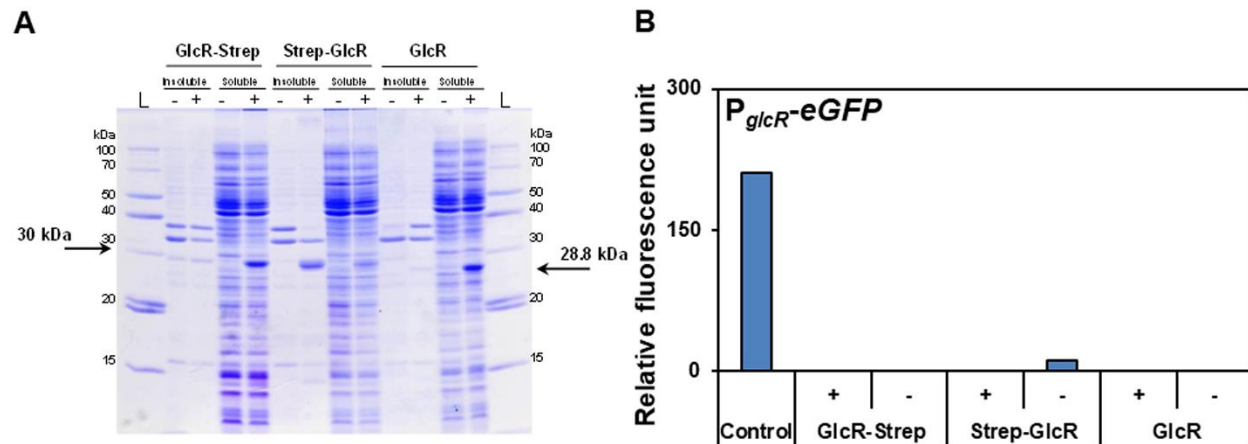

**FIG S2 Overexpression of *glcR* in *E. coli* JW2409-1 ( $\Delta ptsI745::kan$ )** (A) Strains KM0433 expressing *glcR-strep* tag, KM0434 expressing *strep* tag-*glcR* and KM0435 expressing *glcR* under control of rhamnose-inducible *rhaP<sub>BAD</sub>* were cultivated in LB for 2 h at 37°C. After adding 0.2% of L-rhamnose, the bacterial culture was further incubated for 4 h at 30°C. The induced (+) and uninduced (-) cells ( $8 \times 10^9$  cells) disrupted by ultrasound and the GlcR production (30 or 28.8 kDa protein bands) was investigated in the soluble and insoluble fractions of the cell lysate by SDS-PAGE. (B) Function of GlcR with(out) *Strep* tag was investigated in *E. coli* JW2409-1 harboring pKAM321 (a pBBR1MCS-2 derivative) with the  $P_{glcR}$ -*eGFP* cassette as a reporter. Derivatives of pBR322, namely pKAM317 (*rhaP<sub>BAD</sub>-glcR-strep* tag), pKAM318 (*rhaP<sub>BAD</sub>-strep* tag-*glcR*) and pKAM319 (*rhaP<sub>BAD</sub>-glcR*) were used for expression of *glcR* variants. Strains KM0453 (Control; without *glcR*), KM0454 (GlcR-*Strep*), KM0455 (*Strep*-GlcR) and KM0456 (GlcR) were cultivated in LB with a starting OD<sub>600</sub> of 0.05. After addition of 0.2% L-rhamnose, the induced (+) and uninduced (-) bacterial cultures were incubated at 30°C and their fluorescence intensity was measured after 16 h.

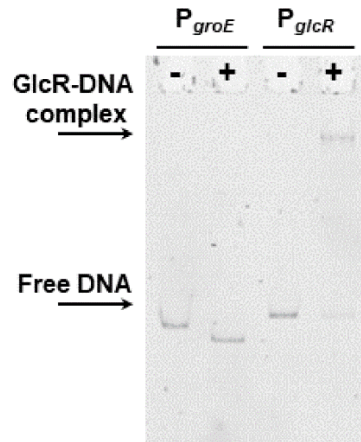

**FIG S3 Interaction between GlcR and different promoter regions.** Electrophoretic mobility shift assay was performed using purified GlcR-*Strep* tag and different 5'-end FITC-labelled DNA fragments. The migration of 10 nM DNA fragments of  $P_{groE}$ ,  $P_{glcR}$ , without (-) or with (+) 400 nM purified GlcR-*Strep* tag was studied. The DNA and protein mixture was incubated for 15 min on ice and afterwards loaded on a 6% native-PAGE. The DNA bands were visualized by a PhosphorImager (Storm 860 PhosphorImager; Molecular Dynamics).

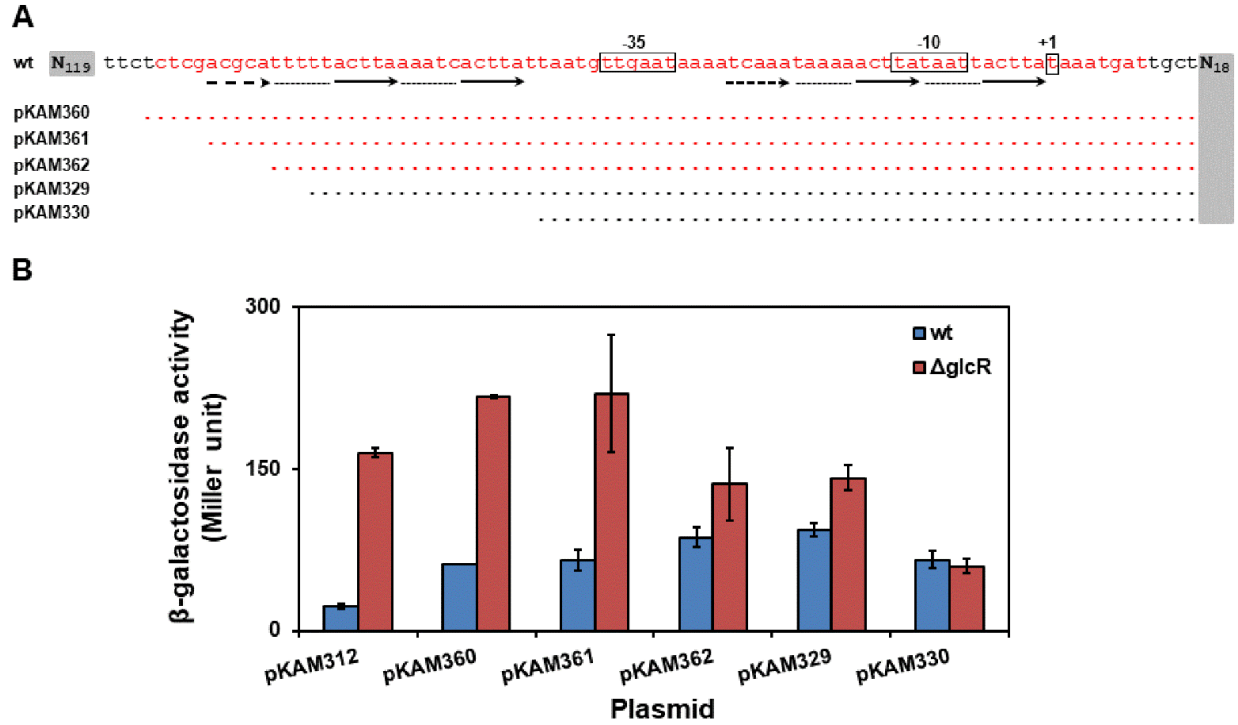

**FIG S4 Identification of the GlcR binding site by shortening the  $P_{glcR}$  5'-end.** (A) The sequence of  $P_{glcR}$  and its shortened versions is shown. The red letters indicate the protected DNA region in DNA footprinting. The core elements of  $P_{glcR}$  (-35 and -10 boxes) and the transcription start site of *glcR* (+1) are shown by open boxes. The solid and dashed arrows show the direct repeats. (B)  $\beta$ -galactosidase activity of strains KM0 (wt) and KM473 ( $\Delta$ *glcR*) was measured after integration of  $P_{glcR}$ -*lacZ* cassette (pKAM312) or shortened  $P_{glcR}$ -*lacZ* (pKAM329, pKAM330, pKAM359, pKAM360, pKAM361 and pKAM362) into *amyE*. All strains were cultivated in LB with a starting OD<sub>600</sub> of 0.05 and the  $\beta$ -galactosidase activity was measured after 3 h of incubation at 37°C.

**A**

| Protein            | Molecular weight (Da) | $V_e/V_0$ |
|--------------------|-----------------------|-----------|
| Ribonuclease A     | 13,700                | 1.94      |
| Myoglobin          | 17,000                | 1.89      |
| Carbonic anhydrase | 29,000                | 1.83      |
| Ovalbumin          | 44,000                | 1.73      |
| Conalbumin         | 75,000                | 1.63      |
| $\gamma$ -globulin | 158,000               | 1.48      |
| Blue Dextran       | 2,000,000             | 1.00      |
| GlcR-1             | 242,102               | 1.40      |
| GlcR-2             | 26,436                | 1.82      |
| YwpJ               | 25,078                | 1.83      |

**B**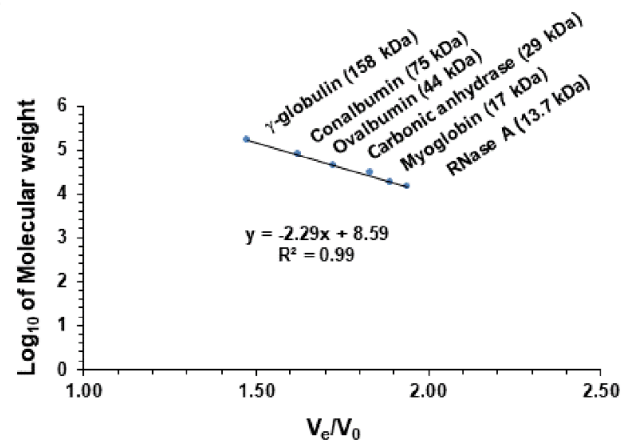**FIG S5 Determination of the molecular size of GlcR by size exclusion chromatography. (A)**

The  $V_e/V_0$  ratio of the studied proteins and molecular weight of the standard proteins, ribonuclease A, myoglobin, carbonic anhydrase, ovalbumin, conalbumin,  $\gamma$ -globulin are shown. Blue dextran was used for determination of the  $V_0$ . GlcR showed two peaks, while YwpJ showed only a single peak. Approximately, 20  $\mu\text{g}$  microgram of each protein was injected in a maximal volume of 50  $\mu\text{l}$  for analysis. (B) The standard curve was drawn based on the molecular size and  $V_e/V_0$  ratio of the standard proteins.

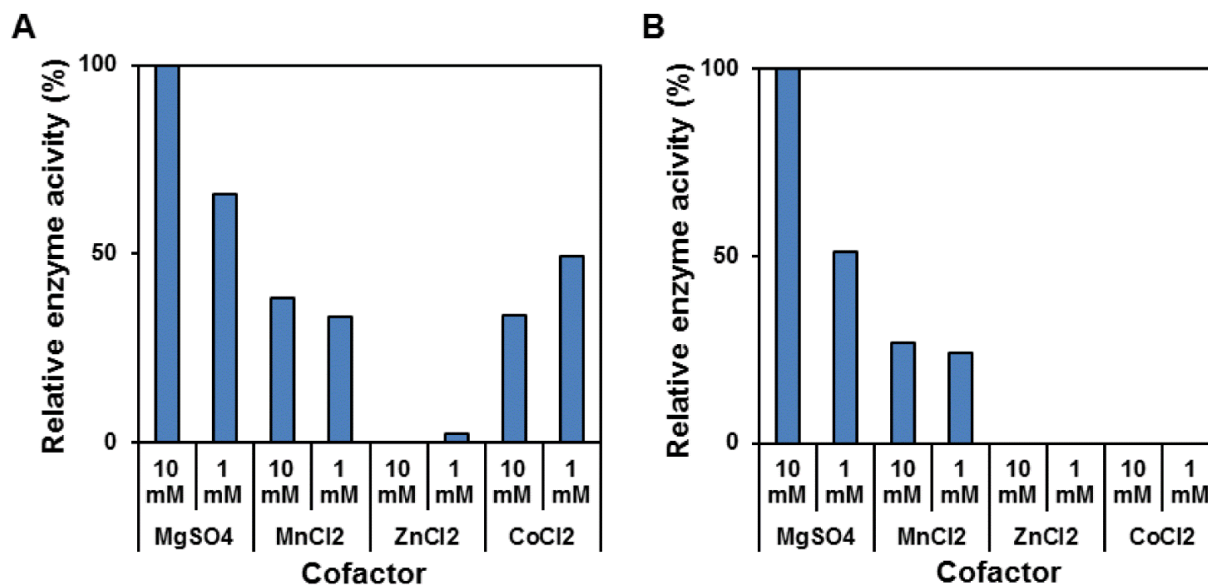

**FIG S6 The effect of cofactors on the phosphatase activity of YwpJ (A) and YcsE (B).** The phosphatase assay was carried out using 50 mM *p*NPP as a substrate in 100 mM sodium acetate buffer at pH 5.7. The enzyme was added at a final concentration of 2.4  $\mu$ M and the reaction was stopped after 5 min incubation at 37°C.

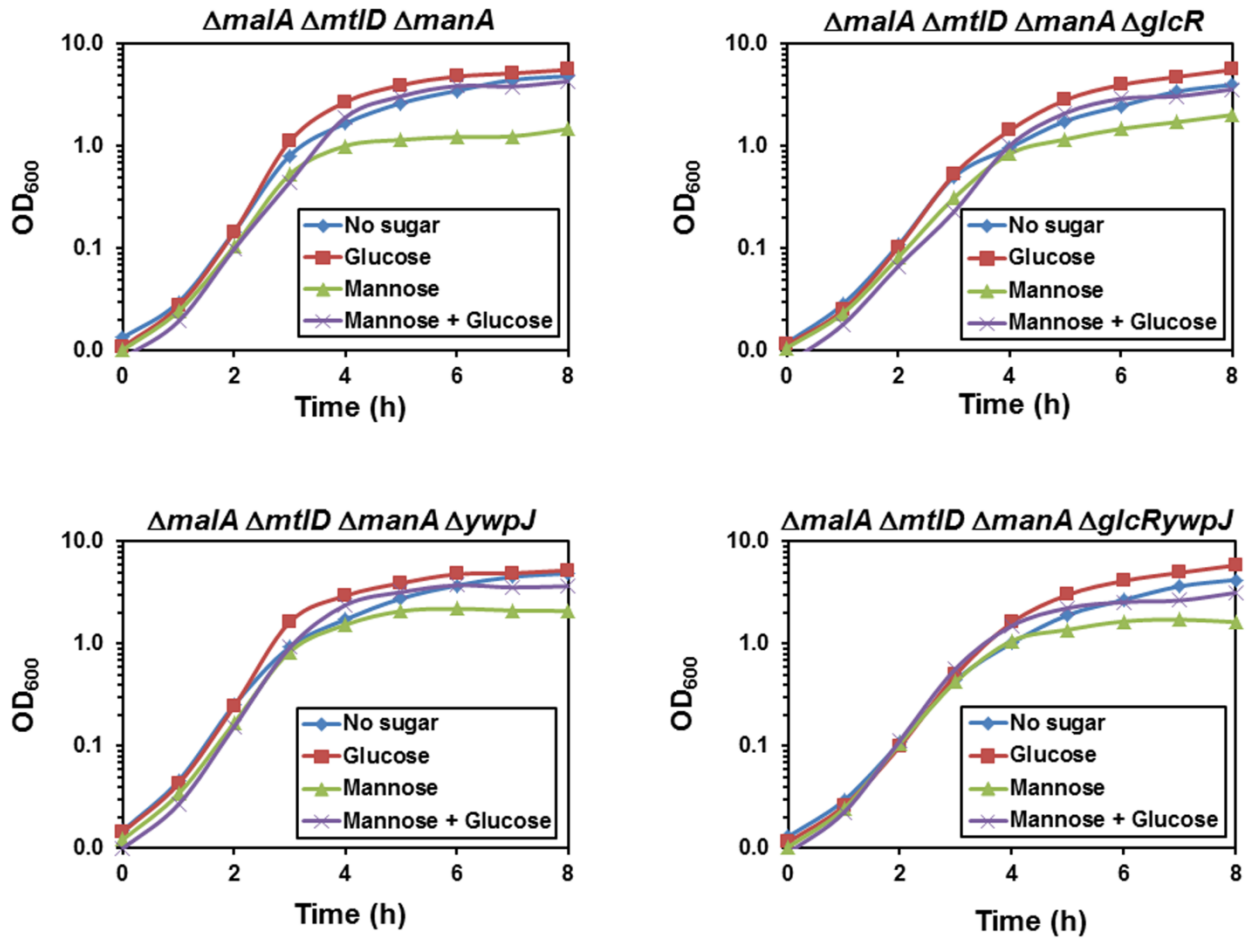

**FIG S7 Studying the effect of YwpJ on the growth of  $\Delta manA$  cells during Man-6P stress.** Growth of strain KM283 ( $\Delta malA \Delta mtlD \Delta manA$ ) and its derivatives KM499 ( $\Delta malA \Delta mtlD \Delta manA \Delta glcR$ ), KM501 ( $\Delta malA \Delta mtlD \Delta manA \Delta ywpJ$ ) and KM503 ( $\Delta malA \Delta mtlD \Delta manA \Delta glcRywpJ$ ) was studied in LB medium without or with 1% (w/v) of glucose or mannose alone or in combination.

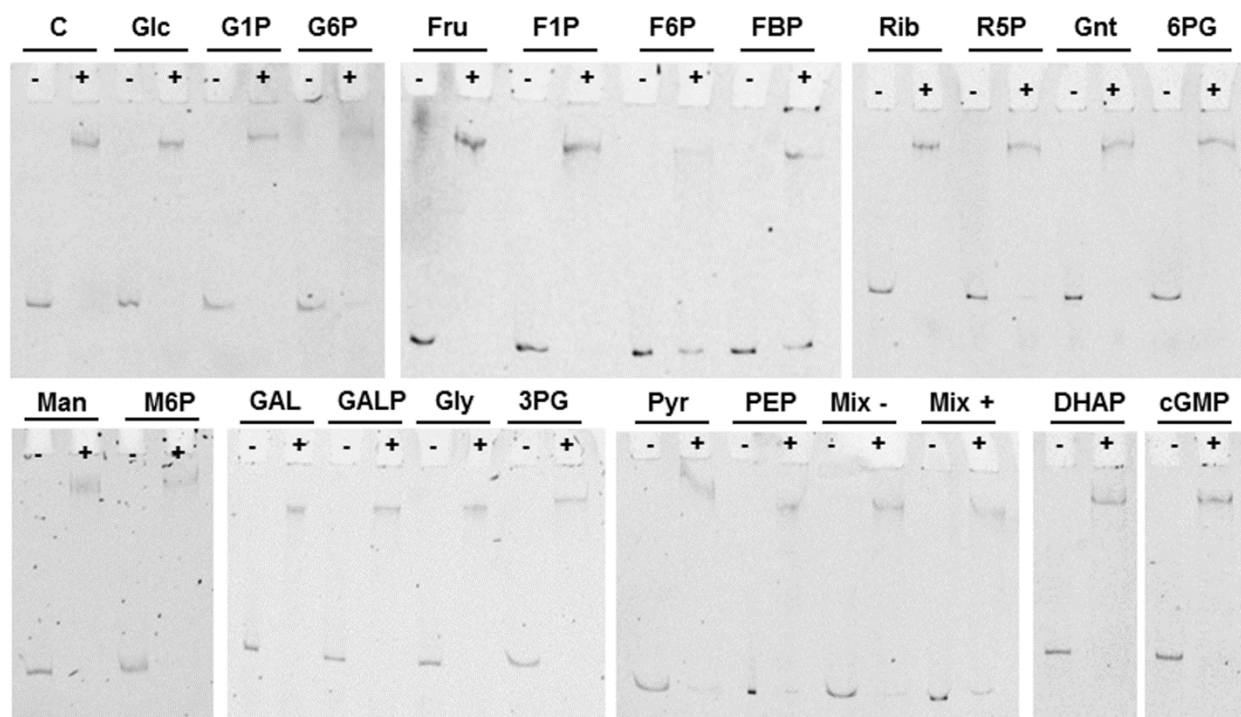

**FIG S8 Investigation of the possible effector of GlcR.** Electrophoretic mobility shift assay was carried out using the 5'-labeled FITC- $P_{glcR}$  DNA and the purified GlcR-*Strep* tag. The migration of the  $P_{glcR}$  DNA (5 nM) was studied in the absence (-) or presence (+) of purified GlcR-*Strep* tag (360 nM). The control (C) contained no effector, while 250 mM of glucose (Glc), glucose 1-phosphate (G1P), glucose 6-phosphate (G6P), fructose (Fru), fructose 1-phosphate (F1P), fructose 6-phosphate (F6P), fructose 1,6-bisphosphate (FBP), ribose (Rib), ribose 5-phosphate (R5P), 6-phosphogluconate (6PG), mannose (Man), mannose 6-phosphate (M6P), glyceraldehyde (GAL), glyceraldehyde 3-phosphate (GALP), glycerol (Gly), 3-phosphoglycerate (3PG), pyruvate (Pyr), phosphoenolpyruvate (PEP), and a negative mixture (Mix -) of 6-phosphogluconate, glucose 1-phosphate, glucose 6-phosphate, fructose 1-phosphate and ribose 5-phosphate, and positive mixture (Mix +) containing fructose 1,6-bisphosphate and fructose 6-phosphate were added to the DNA with a total concentration of 250 mM. Due to its low solubility, mannose 6-phosphate was added to a final concentration of 62.5 mM. Dihydroxyacetone phosphate (DHAP) and guanosine 3':5'-cyclic monophosphate (cGMP) were added at a final concentration of 20 mM.



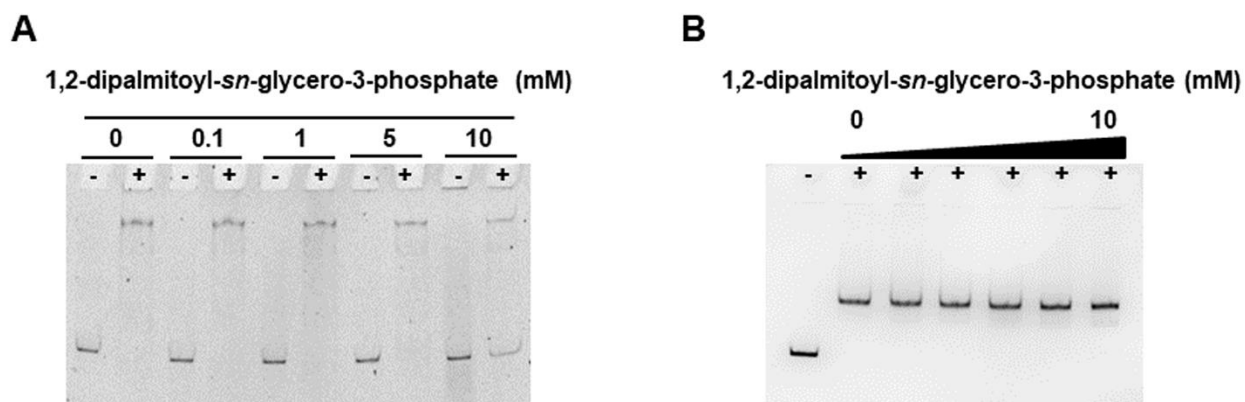

**FIG S9 The effect of 1,2-dipalmitoyl-*sn*-glycero-3-phosphate on the protein-DNA complex.**

**(A)** The migration of the 5'-end FITC-labelled  $P_{glcR}$  DNA (5 nM) was studied without (-) or with (+) purified GlcR-*Strep* tag (360 nM). 1,2-dipalmitoyl-*sn*-glycero-3-phosphate was added to the DNA-protein complex with different concentrations (0 – 10 mM). **(B)** The migration of the 5'-end Cy5-labelled  $P_{merR}$  (5 nM) was studied in the presence (+) or absence (-) of MerR. Different concentrations of 1,2-dipalmitoyl-*sn*-glycero-3-phosphate were added to the reaction. The reaction was carried out as thoroughly explained before (14).

## References

1. Sambrook J, Russell DW. 2001. Molecular cloning: a laboratory manual, 3rd ed. Cold Spring Harbor Laboratory Press, Cold Spring Harbor, N.Y.
2. Altenbuchner J, Viell P, Pelletier I. 1992. Positive selection vectors based on palindromic DNA sequences. *Methods Enzymol* 216:457-466.
3. Hoffmann J, Bóna-Lovász J, Beuttler H, Altenbuchner J. 2012. *In vivo* and *in vitro* studies on the carotenoid cleavage oxygenases from *Sphingopyxis alaskensis* RB2256 and *Plesiocystis pacifica* SIR-1 revealed their substrate specificities and non-retinal-forming cleavage activities. *FEBS J* 279:3911-3924.
4. Morabbi Heravi K, Altenbuchner J. 2014. Regulation of the *Bacillus subtilis* mannitol utilization genes: promoter structure and transcriptional activation by the wild-type regulator (MtlR) and its mutants. *Microbiology* 160:91-101.
5. Warth L, Altenbuchner J. 2013. A new site-specific recombinase-mediated system for targeted multiple genomic deletions employing chimeric *loxP* and *mrrS* sites. *Appl Microbiol Biotechnol* 97:6845-56.
6. Watzlawick H, Morabbi Heravi K, Altenbuchner J. 2016. Role of the *ganSPQAB* operon in degradation of galactan by *Bacillus subtilis*. *J Bacteriol* 198:2887-2896.
7. Graf N, Wenzel M, Altenbuchner J. 2016. Identification and characterization of the vanillin dehydrogenase YfmT in *Bacillus subtilis* 3NA. *Appl Microbiol Biotechnol* 100:3511-21.
8. Morabbi Heravi K, Altenbuchner J. 2018. Cross-talk among transporters of the phosphoenolpyruvate-dependent phosphotransferase system in *Bacillus subtilis*. *J Bacteriol* 200.
9. Cherepanov PP, Wackernagel W. 1995. Gene disruption in *Escherichia coli*: TcR and KmR cassettes with the option of Flp-catalyzed excision of the antibiotic-resistance determinant. *Gene* 158:9-14.
10. Harwood CR, Cutting SM. 1990. Molecular biological methods for *Bacillus*. Wiley, Chichester ; New York.
11. Wenzel M, Altenbuchner J. 2015. Development of a markerless gene deletion system for *Bacillus subtilis* based on the mannose phosphoenolpyruvate-dependent phosphotransferase system. *Microbiology* 161:1942-9.

12. Laemmli UK. 1970. Cleavage of structural proteins during the assembly of the head of bacteriophage T4. *Nature* 227:680-5.
13. Bradford MM. 1976. A rapid and sensitive method for the quantitation of microgram quantities of protein utilizing the principle of protein-dye binding. *Anal Biochem* 72:248-54.
14. Rother D, Mattes R, Altenbuchner J. 1999. Purification and characterization of MerR, the regulator of the broad-spectrum mercury resistance genes in *Streptomyces lividans* 1326. *Mol Gen Genet* 262:154-162.
15. Yanisch-Perron C, Vieira J, Messing J. 1985. Improved M13 phage cloning vectors and host strains: nucleotide sequences of the M13mp18 and pUC19 vectors. *Gene* 33:103-119.
16. Baba T, Ara T, Hasegawa M, Takai Y, Okumura Y, Baba M, Datsenko KA, Tomita M, Wanner BL, Mori H. 2006. Construction of *Escherichia coli* K-12 in-frame, single-gene knockout mutants: the Keio collection. *Mol Syst Biol* 2:2006.0008-2006.0008.
17. Koo BM, Kritikos G, Farelli JD, Todor H, Tong K, Kimsey H, Wapinski I, Galardini M, Cabal A, Peters JM, Hachmann AB, Rudner DZ, Allen KN, Typas A, Gross CA. 2017. Construction and analysis of two genome-scale deletion libraries for *Bacillus subtilis*. *Cell Syst* 4:291-305 e7.
18. Rahmer R, Morabbi Heravi K, Altenbuchner J. 2015. Construction of a super-competent *Bacillus subtilis* 168 using the  $P_{m1A-comKS}$  inducible cassette. *Front Microbiol* 6:1431.
19. Kovach ME, Elzer PH, Steven Hill D, Robertson GT, Farris MA, Roop RM, Peterson KM. 1995. Four new derivatives of the broad-host-range cloning vector pBBR1MCS, carrying different antibiotic-resistance cassettes. *Gene* 166:175-176.
20. Brünker P, Rother D, Klein J, Mattes R, Altenbuchner J, Sedlmeier R. 1996. Regulation of the operon responsible for broad-spectrum mercury resistance in *Streptomyces lividans* 1326. *Mol Gen Genet* 251:307-315.
21. Morabbi Heravi K, Wenzel M, Altenbuchner J. 2011. Regulation of *mtl* operon promoter of *Bacillus subtilis*: requirements of its use in expression vectors. *Microb Cell Fact* 10:83.
